# Supplementary material for: Zero-Field Slow Magnetic Relaxation in Binuclear Dy Acetylacetonate Complex with Pyridine-N-Oxide
Source: MDPI journal article supplement (doi:10.3390/magnetochemistry9040105), 2023-04-12
Supplement: s1 [file s1]

**Table S1.** Main crystallographic data for the crystal of complex **1**.

|                                   |                                                                                                             |
|-----------------------------------|-------------------------------------------------------------------------------------------------------------|
| Empirical formula                 | C <sub>42</sub> H <sub>54</sub> Cl <sub>6</sub> N <sub>2</sub> O <sub>14</sub> Dy <sub>2</sub> ( <b>1</b> ) |
| Formula weight                    | 1348.56                                                                                                     |
| Temperature                       | 100.00(10) K                                                                                                |
| Wavelength                        | 0.7107 Å                                                                                                    |
| Crystal system, space group       | Monoclinic, P 21/c                                                                                          |
| a, Å                              | 10.3832(4)                                                                                                  |
| b, Å                              | 18.1959(10)                                                                                                 |
| c, Å                              | 13.7949(4)                                                                                                  |
| alpha, deg.                       | 90                                                                                                          |
| beta, deg.                        | 92.590(3)                                                                                                   |
| gamma, deg.                       | 90                                                                                                          |
| Volume                            | 2603.63(19) Å <sup>3</sup>                                                                                  |
| Z, Calculated density             | 4, 1.720 Mg/m <sup>3</sup>                                                                                  |
| Absorption coefficient            | 3.217 mm <sup>-1</sup>                                                                                      |
| F(000)                            | 1332                                                                                                        |
| Crystal size                      | 0.10 x 0.05 x 0.02 mm                                                                                       |
| Theta range for data collection   | 2.956 to 26.069 deg.                                                                                        |
| Limiting indices                  | -12<=h<=12, -15<=k<=22, -17<=l<=9                                                                           |
| Reflections collected / unique    | 10218 / 5131 [R(int) = 0.0742]                                                                              |
| Completeness to theta             | 25.242 99.8 %                                                                                               |
| Absorption correction             | Semi-empirical from equivalents                                                                             |
| Max. and min. transmission        | 1.00000 and 0.54734                                                                                         |
| Refinement method                 | Full-matrix least-squares on F <sup>2</sup>                                                                 |
| Data / restraints / parameters    | 5131 / 12 / 298                                                                                             |
| Goodness-of-fit on F <sup>2</sup> | 0.818                                                                                                       |
| Final R indices [I>2sigma(I)]     | R1 = 0.0503, wR2 = 0.0734                                                                                   |
| R indices (all data)              | R1 = 0.1010, wR2 = 0.0921                                                                                   |
| Extinction coefficient            | n/a                                                                                                         |
| Largest diff. peak and hole       | 1.604 and -1.334 e.Å <sup>-3</sup>                                                                          |

**Table S2.** Selected bond lengths and valence angles in complex **1**.

| Bond            | d, Å       | Bond              | d, Å       |
|-----------------|------------|-------------------|------------|
| Dy(1)-O(2)      | 2.312(4)   | Dy(1)-O(5)        | 2.360(5)   |
| Dy(1)-O(4)      | 2.321(5)   | Dy(1)-O(7)#1      | 2.425(5)   |
| Dy(1)-O(1)      | 2.335(5)   | Dy(1)-O(7)        | 2.514(5)   |
| Dy(1)-O(3)      | 2.340(5)   | Dy(1)-O(6)        | 2.313(5)   |
| Угол            | ω, degree  | Угол              | ω, degree  |
| O(6)-Dy(1)-O(2) | 141.30(18) | O(3)-Dy(1)-O(5)   | 75.70(17)  |
| O(6)-Dy(1)-O(4) | 76.94(17)  | O(6)-Dy(1)-O(7)#1 | 92.75(17)  |
| O(2)-Dy(1)-O(4) | 73.75(18)  | O(2)-Dy(1)-O(7)#1 | 90.70(16)  |
| O(6)-Dy(1)-O(1) | 145.88(16) | O(4)-Dy(1)-O(7)#1 | 135.36(18) |
| O(2)-Dy(1)-O(1) | 72.48(16)  | O(1)-Dy(1)-O(7)#1 | 79.43(17)  |
| O(4)-Dy(1)-O(1) | 130.88(17) | O(3)-Dy(1)-O(7)#1 | 151.38(17) |
| O(6)-Dy(1)-O(3) | 92.77(17)  | O(5)-Dy(1)-O(7)#1 | 79.17(17)  |
| O(2)-Dy(1)-O(3) | 102.21(17) | O(6)-Dy(1)-O(7)   | 74.26(16)  |
| O(4)-Dy(1)-O(3) | 73.18(19)  | O(2)-Dy(1)-O(7)   | 74.10(16)  |
| O(1)-Dy(1)-O(3) | 80.31(18)  | O(4)-Dy(1)-O(7)   | 74.85(17)  |
| O(6)-Dy(1)-O(5) | 72.89(17)  | O(1)-Dy(1)-O(7)   | 126.62(16) |
| O(2)-Dy(1)-O(5) | 145.27(17) | O(3)-Dy(1)-O(7)   | 147.48(17) |
| O(4)-Dy(1)-O(5) | 134.97(18) | O(5)-Dy(1)-O(7)   | 125.72(15) |
| O(1)-Dy(1)-O(5) | 73.03(16)  | O(7)#1-Dy(1)-O(7) | 60.60(19)  |

**Table S3.** The local symmetry of Dy(III) ions for **1** defined by the continuous shape measure (CShM) analysis with SHAPE 2.1 software [54].

|          |                       |              | Structure                                  | CShM         |
|----------|-----------------------|--------------|--------------------------------------------|--------------|
| 1        | D <sub>8h</sub>       | OP-8         | Octagon                                    | 32.054       |
| 2        | C <sub>7v</sub>       | HPY-8        | Heptagonal pyramid                         | 24.336       |
| 3        | D <sub>6h</sub>       | HBPY-8       | Hexagonal bipyramid                        | 16.100       |
| 4        | O <sub>h</sub>        | CU-8         | Cube                                       | 9.942        |
| 5        | D <sub>4d</sub>       | SAPR-8       | Square antiprism                           | 2.529        |
| <b>6</b> | <b>D<sub>2d</sub></b> | <b>TDD-8</b> | <b>Triangular dodecahedron</b>             | <b>0.492</b> |
| 7        | D <sub>2d</sub>       | JGBF-8       | Johnson gyrobifastigium J26                | 13.453       |
| 8        | D <sub>3h</sub>       | JETBPY-8     | Johnson elongated triangular bipyramid J14 | 29.524       |
| 9        | C <sub>2v</sub>       | JBTPR-8      | Biaugmented trigonal prism J50             | 2.623        |
| 10       | C <sub>2v</sub>       | BTPR-8       | Biaugmented trigonal prism                 | 2.183        |
| 11       | D <sub>2d</sub>       | JSD-8        | Snub diphendoid J84                        | 2.802        |
| 12       | T <sub>d</sub>        | TT-8         | Triakis tetrahedron                        | 10.614       |
| 13       | D <sub>3h</sub>       | ETBPY-8      | Elongated trigonal bipyramid               | 24.076       |

**Table S4.** SINGLE\_ANISO computed wave function decomposition analysis for the lowest KDs of Dy(III) ion in **1**. Only main contributions (>10%) are shown

| KD       | RASSI wave function composition                                                                                                                             |
|----------|-------------------------------------------------------------------------------------------------------------------------------------------------------------|
| <b>1</b> | <b>0.945</b>   $\pm 15/2$ $\rangle$                                                                                                                         |
| <b>2</b> | <b>0.795</b>   $\pm 13/2$ $\rangle$ +0.176   $\pm 9/2$ $\rangle$                                                                                            |
| <b>3</b> | <b>0.225</b>   $\pm 11/2$ $\rangle$ + 0.211   $\pm 1/2$ $\rangle$ + 0.207   $\pm 3/2$ $\rangle$ + 0.175   $\pm 7/2$ $\rangle$ + 0.125   $\pm 5/2$ $\rangle$ |
| <b>4</b> | <b>0.266</b>   $\pm 11/2$ $\rangle$ + 0.265   $\pm 1/2$ $\rangle$ +0.233   $\pm 7/2$ $\rangle$ +0.124   $\pm 3/2$ $\rangle$                                 |
| <b>5</b> | <b>0.388</b>   $\pm 5/2$ $\rangle$ + 0.272   $\pm 3/2$ $\rangle$ +0.148   $\pm 1/2$ $\rangle$ + 0.119  $\pm 9/2$ $\rangle$                                  |
| <b>6</b> | <b>0.298</b>   $\pm 9/2$ $\rangle$ +0.234   $\pm 7/2$ $\rangle$ +0.195   $\pm 11/2$ $\rangle$                                                               |
| <b>7</b> | <b>0.276</b>   $\pm 1/2$ $\rangle$ + 0.256   $\pm 3/2$ $\rangle$ +0.132   $\pm 9/2$ $\rangle$ + 0.122   $\pm 5/2$ $\rangle$ +0.102   $\pm 11/2$ $\rangle$   |
| <b>8</b> | <b>0.274</b>   $\pm 7/2$ $\rangle$ +0.223   $\pm 9/2$ $\rangle$ +0.186   $\pm 5/2$ $\rangle$ + 0.124  $\pm 11/2$ $\rangle$                                  |

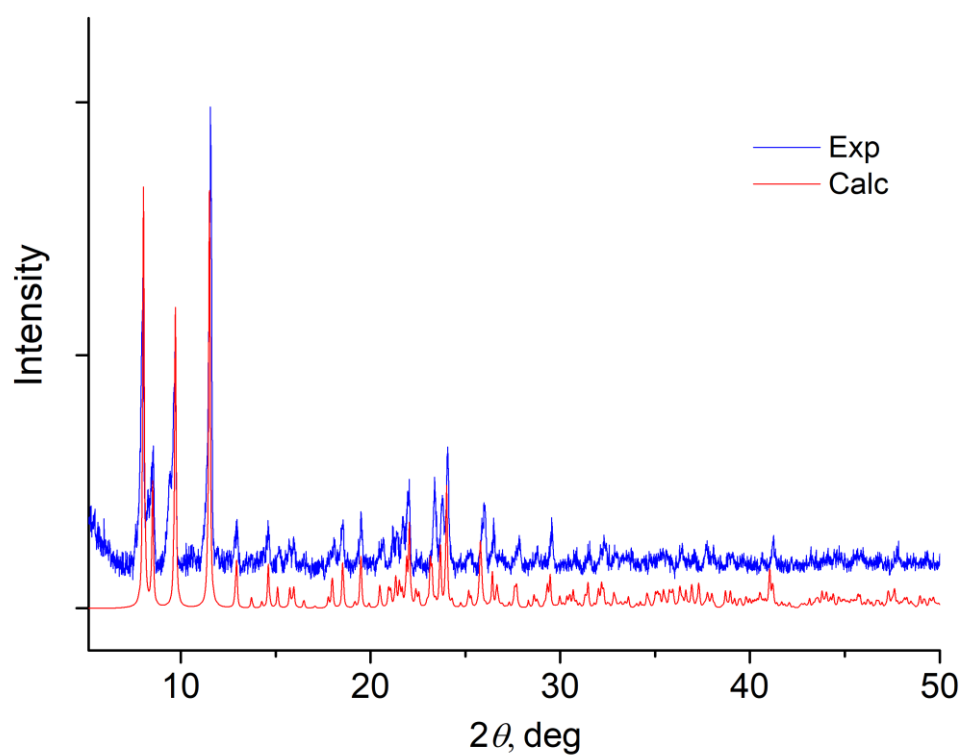

**Figure S1.** Powder X-ray diffraction pattern of polycrystalline sample of **1**: experimental (blue), and calculated from single crystal data (red).

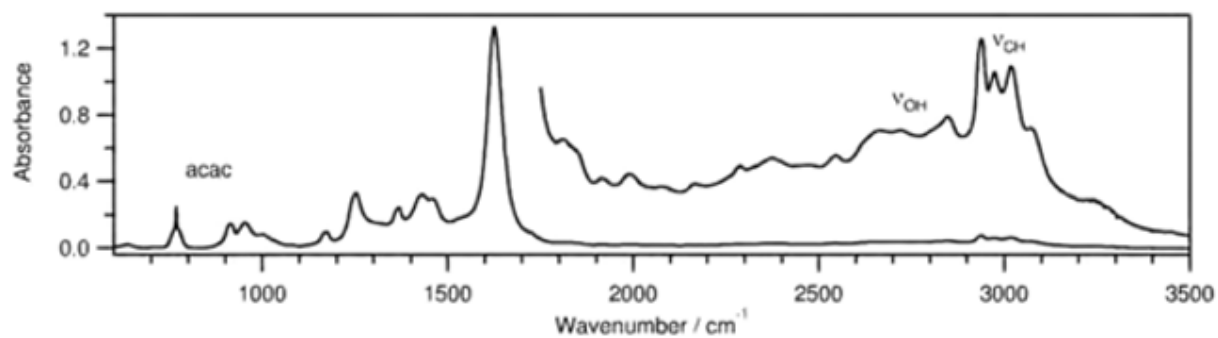

**Figure S2.** Experimental IR spectrum of acac **Error! Reference source not found..**

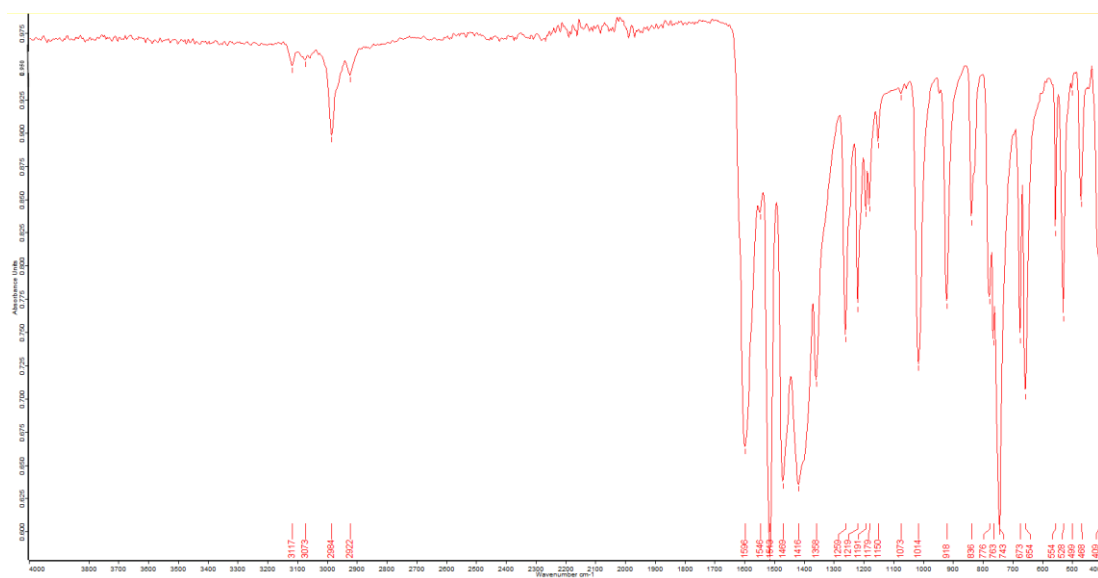

**Figure S3.** Experimental IR spectrum of **1**.

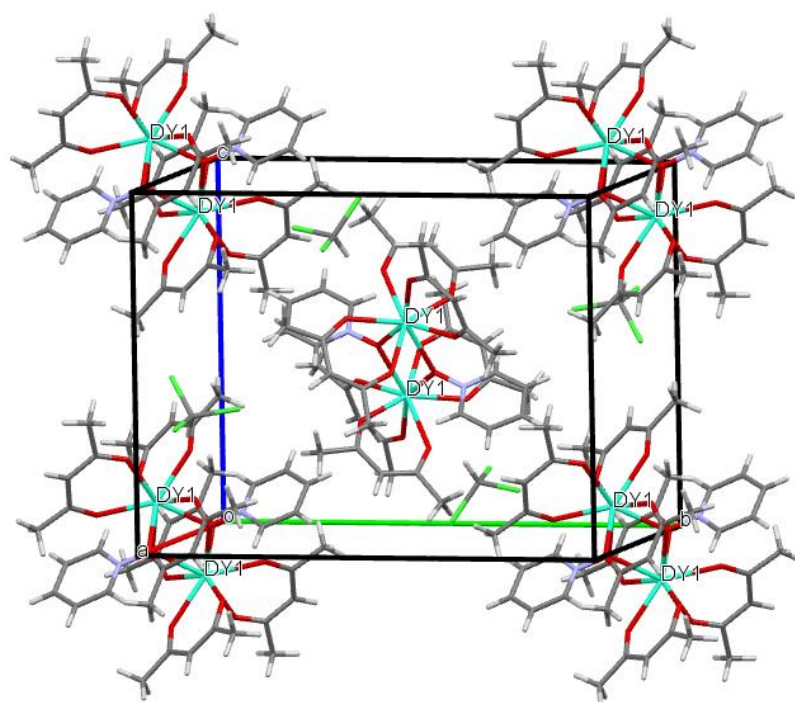

**Figure S4.** Crystalline packing of **1**.

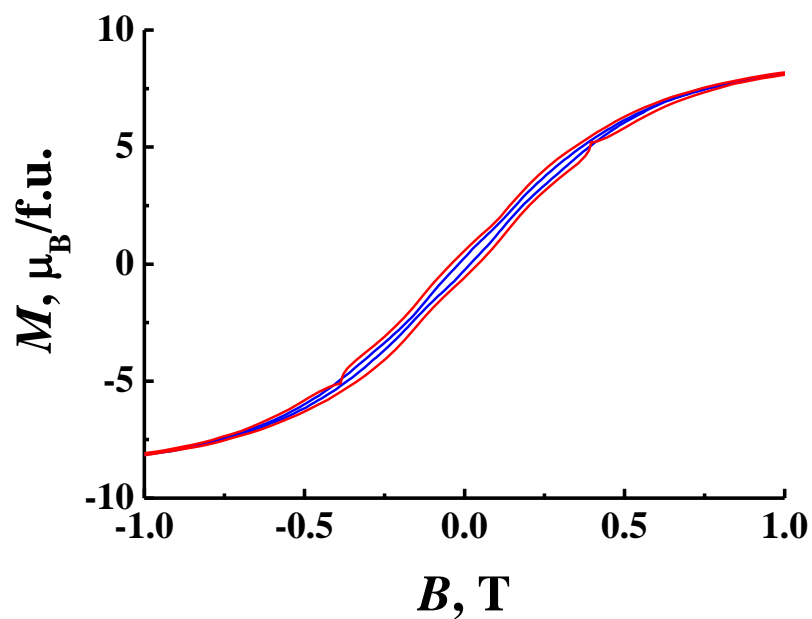

**Figure S5.** Magnetic hysteresis loops at 2 K with magnetic field sweep rates of 0.3 T/min (blue line) and 0.9 T/min (red line).

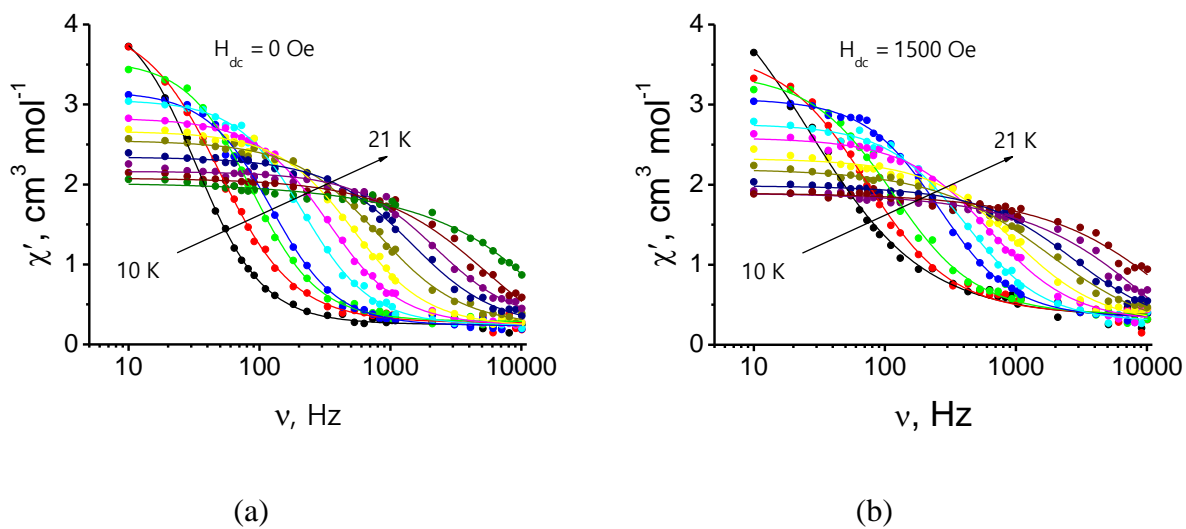

**Figure S6.** Frequency dependences of the in-phase ac susceptibility signals for complex 1 at zero (a) and 1500 Oe (b) dc fields and temperatures from 10 to 21 K.

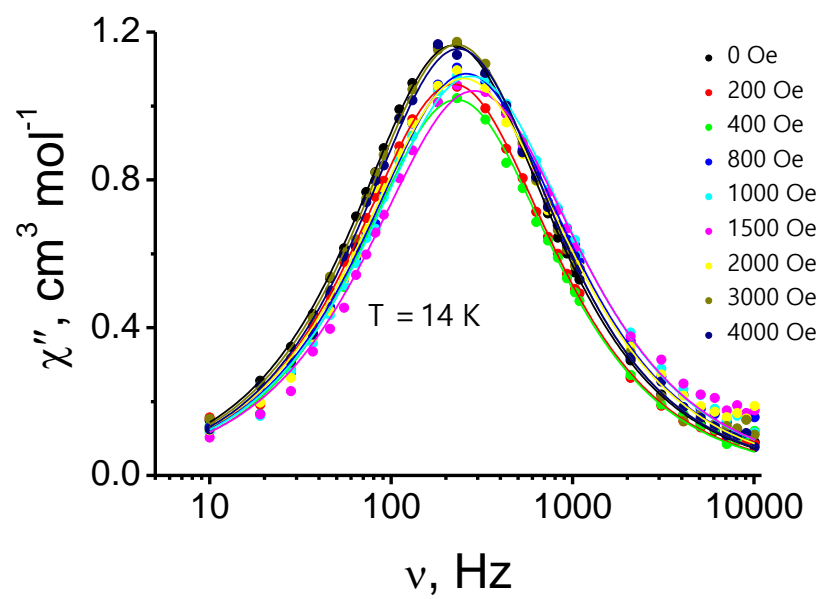

**Figure S7.** Frequency dependences of the out-of-phase ac susceptibility for **1** at temperature 14 K and applied dc fields from 0 to 4000 Oe.
